# Supplementary material
Source: Elsevier journal article supplement (https://www.sciencedirect.com/science/article/pii/S0210569116302157)
Supplement: mmc1 [file S0210569116302157:mmc1.docx]

**Tabla 5.** Mediciones electrocardiográficas realizadas según las regiones isquémicas.

| **Topografía** | **Variables electrocardiográficas (ms, media±DE)** | | | |
| --- | --- | --- | --- | --- |
| **QRS** | **dQRS** | **QTc** | **dQTc** |
| Ántero-apical | 75,7±11,5 | 23,3±15,7 | 476,9±69,6 | 79,8±25,8 |
| Anterior extenso | 92,3±18,8 | 37,9±23,9 | 518,5±72,2 | 94,9±26,8 |
| Inferior + VD | 72,3±3,1 | 17,5±9,6 | 449,3±64,8 | 86,4±16,0 |
| Inferior | 72,0±5,5 | 18,6±7,1 | 432,3±64,3 | 47,6±23,9 |
| Inferolateral | 74,8±7,7 | 16,2±7,7 | 453,2±97,7 | 71,8±35,1 |
| Lateral | 72,4±8,8 | 26,7±8,2 | 431,9±121,9 | 59,9±47,7 |
| Probabilidad | <0,001 | <0,001 | <0,001 | <0,001 |

DE, desviación estándar, dQRS, dispersión del QRS; dQTc, dispersión del QT corregido; ms, milisegundos; QTc, intervalo QT corregido; VD, ventrículo derecho.
